# Supplementary material
Source: Springer Nature journal article supplement (https://www.springermedizin.de/resource/supplementary/12935_2010_246_MOESM3_ESM.pdf/9540140)

pcDNA-IL2-3HA-3UTR Wt

pcDNA-IL2-3HA-3UTR Mu

DF-1

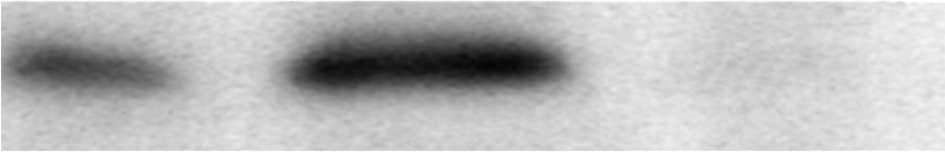

IL2-3HA



$\alpha$ -tubulin

Supplement: MOESM3 [file 9540140]
